# Supplementary material for: Varying the expression pattern of the strigolactone receptor gene DAD2 results in phenotypes distinct from both wild type and knockout mutants
Source: Front Plant Sci. 2023 Oct 11;14:1277617. doi: 10.3389/fpls.2023.1277617 (PMC10600376; doi:10.3389/fpls.2023.1277617)
Supplement: Supplementary file 3 [file Table_1.xlsx]

## Sheet: Sheet1
Supplemental Table 1
DNA sequences of primers used in the research
Primer name	Sequence	Purpose	Source
AtD14p for	GAGAATTCGAGCTCTCCTGTTAATGGTGGATATGTATAAAAGA	Cloning AtD14 promoter
AtD14p rev	TGGAATTCCTCGAGTTTTTTATGTGTTTGGGTTTGAGGGTA	Cloning AtD14 promoter
oHWL29	ATGCGGTCCGGACAGACCCTTTTAGATGCTT	PCR primer for cDNA detection
oPBG3	AAGTAGGGGCACTAAGATGAGG	PCR primer for cDNA detection
DAD2_INF_rev	GGGGCACTAAGATGAGGCAA	sequencing of cDNA amplicons
oPBG27	ACAAACAATGTTATGTCTGGTCTC	sequencing of cDNA amplicons
AtD14-CC9-2F	ATTGACATCAGCTCCAACAGCAAG	Oligo for CRISPR guide construction
AtD14-CC9-2R	AAACCTTGCTGTTGGAGCTGATGT	Oligo for CRISPR guide construction
d14-seto-wt-for	ACACAACTCTCGATCCTTACGTCGA	PCR primer for editing detection by sequence
D14-CC9test-rev	GACAATGCCAAACTGTCCTCCACA	PCR primer for editing detection by sequence
d14#2_off1-F	AGCCCTTATTACTATGTGCAATGC	Sequencing of CRISPR off-target sites
d14#2_off1-R	AGATCGATAAAGTGTTGTTGCCT	Sequencing of CRISPR off-target sites
d14#2_off2-F	CGGAAGTAGGCCCTTAACCC	Sequencing of CRISPR off-target sites
d14#2_off2-R	ACCGCTACAACTGCCTTACC	Sequencing of CRISPR off-target sites
d14#2_off3-F	TGGAGTGGTTGGAATGACGG	Sequencing of CRISPR off-target sites
d14#2_off3-R	AGCAAAGTCCTGGTTCAGCA	Sequencing of CRISPR off-target sites
d14#2_off4-F	GGAAACACAGACACCTTTGGC	Sequencing of CRISPR off-target sites
d14#2_off4-R	CCGGAAGCAACCACAGTGTA	Sequencing of CRISPR off-target sites
d14#2_off5-F	CGCGACCAACTCCAACATTG	Sequencing of CRISPR off-target sites
d14#2_off5-R	ACCAGTTCTGCGCCAATGAA	Sequencing of CRISPR off-target sites
AtD14 CC9 2F	ATTGACATCAGCTCCAACAGCAAG	Genotyping of Atd14-7 wild type allele
2-12 wt for	ATCAGCTTGGCACTTGATCCTTCCT	Genotyping of Atd14-7 both alleles
2-12 SNP rev	GCCGGAACATCAGCTCCAAAAGA	Genotyping of Atd14-7 mutant allele
oHWL32	TACGTACCATTCTGCATGTCATT	Genotyping of max4-2 wild type allele
oHWL39	TGCAGGTTTCCAACGACTAAT	Genotyping of max4-2 both alleles
SPM8225 rev	TCGGCTTATTTCAGTAAGAGTG	Genotyping of max4-2 mutant allele	Sorefan et al 2003
oHWL29	ATGCGGTCCGGACAGACCCTTTTAGATGCTT	Transcript analysis of DAD2 gene
oPBG3	AAGTAGGGGCACTAAGATGAGG	Transcript analysis of DAD2 gene
oPBG27	GTAGGCGCGCCATGGGACAGACCCTTTTAGATGC	Transcript analysis of DAD2 gene
DAD2_INFrev	GGGGCACTAAGATGAGGCAA	Transcript analysis of DAD2 gene
oHWL37	ACACAGTGCATTGGTTGATTATTGAAGGGCATTTGCC	Site direct mutagensis of DAD2 - N242I
oHWL38	GGCAAATGCCCTTCAATAATCAACCAATGCACTGTGT	Site direct mutagensis of DAD2 - N242I
oHWL35	TTGTGCTTATGTTGGTCACGCTGTTTCTGCTATGATTGG	Site direct mutagensis of DAD2 - N124S
oHWL36	CCAATCATAGCAGAAACAGCGTGACCAACATAAGCACAA	Site direct mutagensis of DAD2 - N124S
oHWL33	TCGGTGCTTCTCCCAGCTTCTTGAATGATGAAGA	Site direct mutagensis of DAD2 - S96A
oHWL34	TCTTCATCATTCAAGAAGCTGGGAGAAGCACCGA	Site direct mutagensis of DAD2 - S96A
DAD2rc-D166Afor	CTTGCTGTTGGAGCTGCTGTTCCTGCTGCTGTT	Site direct mutagensis of DAD2recode
DAD2rc-D166Arev	AACAGCAGCAGGAACAGCAGCTCCAACAGCAAG	Site direct mutagensis of DAD2recode
DAD2rc-F135Afor	CTTAATGATGAAGATTATCATGGAGGAGCTGAACAAGGAGAAATTGAAAAGGT	Site direct mutagensis of DAD2recode
DAD2rc-F135Arev	ACCTTTTCAATTTCTCCTTGTTCAGCTCCTCCATGATAATCTTCATCATTAAG	Site direct mutagensis of DAD2recode
DAD2rc-N242Ifor	AAAGAATACTGTTCATTGGCTTATTATTGAAGGACATCTTCCTCATC	Site direct mutagensis of DAD2recode
DAD2rc-N242Irev	GATGAGGAAGATGTCCTTCAATAATAAGCCAATGAACAGTATTCTTT	Site direct mutagensis of DAD2recode
DAD2rc-S96Afor	GGAATTGATTGTTGTGCTTATGTTGGACATGCTGTTTCTGCTATGAT	Site direct mutagensis of DAD2recode
DAD2rc-S96Arev	ATCATAGCAGAAACAGCATGTCCAACATAAGCACAACAATCAATTCC	Site direct mutagensis of DAD2recode
revKAN-F	GAGCTAAGCACATACGTCAGAAAC	Genotyping nptII gene
revKAN-R2	CCACCATGATATTCGGCAAGCA	Genotyping nptII gene
revKAN-F	GAGCTAAGCACATACGTCAGAAAC	ddPCR nptII copy number quantification
oMMS2	GGTAAAGAAGTTGCGGATAAGG	ddPCR nptII copy number quantification
oHS36	GAGGTGGAGATTGGAGGCTAT	ddPCR PhMAX1 copy number quantification
oHS37	TTCTCTGGTTCAGGGAAGTTCT	ddPCR PhMAX1 copy number quantification
DAD3RT1	CTGAAAGGTGGGAAGATGGT	ddPCR PhCCD7 copy number quantification
DAD3RT2	CCTTCCCACAAGCATAACAA	ddPCR PhCCD7 copy number quantification
omax12	GTCCAGGACTATGGCATGTAG	ddPCR dad1-1 mutation copy number quantification
omax34	CCAAATCTTCTCTAGTGAGTC	ddPCR dad1-1 mutation copy number quantification
